# Supplementary material for: Carboxylic acid functionalized ortho-linked oxacalix[2]benzene[2]pyrazine: synthesis, structure, hydrogen bond and metal directed self-assembly
Source: Royal Society of Chemistry journal article supplement (doi:10.1039/c2dt11283c), 2012-01-01
Supplement: c2dt11283c.pdf [file c2dt11283c.pdf]

# Carboxylic Acid Functionalized *ortho*-Linked Oxalix[2]benzene[2] pyrazine: Synthesis, Structure, Hydrogen Bond and Metal Directed Self-Assembly

Ling-Wei Kong,<sup>a</sup> Ming-Liang Ma,<sup>a</sup> Liang-Chun Wu,<sup>a</sup> Xiao-Li Zhao,<sup>b</sup>  
Fang Guo,<sup>c</sup> Biao Jiang,<sup>\*c</sup> and Ke Wen<sup>\*ac</sup>

<sup>a</sup>*Division of Supramolecular Chemistry and Medicinal Chemistry, Key Laboratory of Brain Functional Genomics, MOE East China Normal University 3663 Zhongshan Road N. Shanghai 200062, China, Fax: (+086) 021-6260-1953  
E-mail: kwen@brain.ecnu.edu.cn*

<sup>b</sup>*Shanghai Key Laboratory of Green Chemistry and Chemical Processes, Department of Chemistry East China Normal University*

<sup>c</sup>*Center for Nanomedicine, Shanghai Advanced Research Institute, Chinese Academy of Science, Shanghai 201203, China. Fax: (+86)021-5080-7562  
E-mail: jiangb@sari.ac.cn*

## Crystal Structure and New Compound's Characterization

1. Comments of Structure of **9**
2. Crystal Structures.
3. HRMS of several New Compounds.
4. NMR of New Compounds.

### Comments of Structure of **9**:

For the crystal structure compound **9**, high R factors are associated with the crystal quality. During the refinement, restraints OMIT, DFIX, ISOR, EADP, EXYZ were used. Due to the highly disordered nature of the ligands **3'** in the structure of **9**, some of the hydrogen atoms in ligands **3'** are not located/ fixed, which are also not included in the formula.

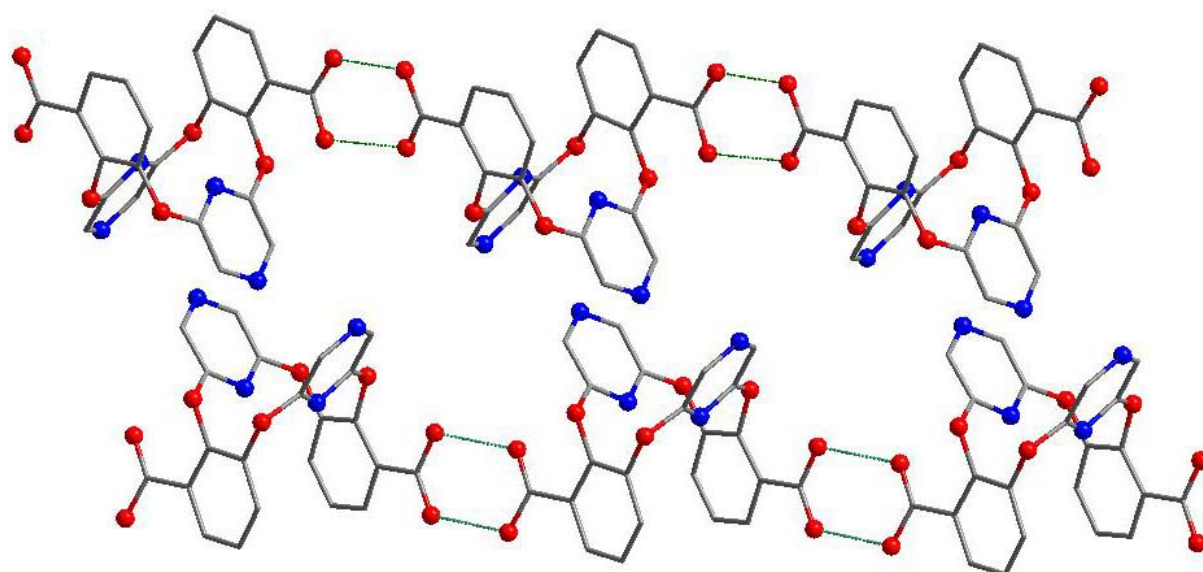

Figure S1 An isomeric pair of hydrogen-bonded supramolecular polymeric chains of **3** obtained in methanol. Color code: O (red), N (blue), and C (gray).

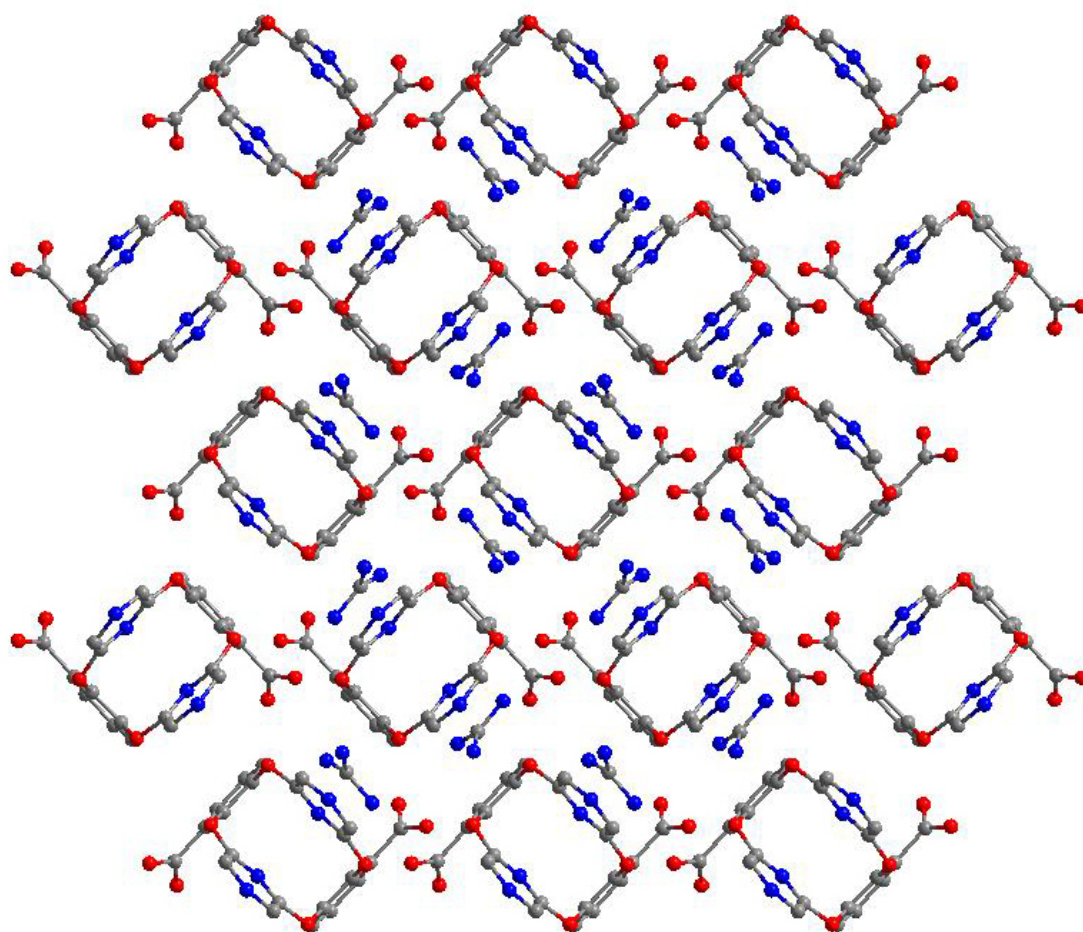

Figure S2 Packing diagram of guanidinium salt of the isomeric pair of **3** viewed along *c* axis. Color code: O (red), N (blue), and C (gray).

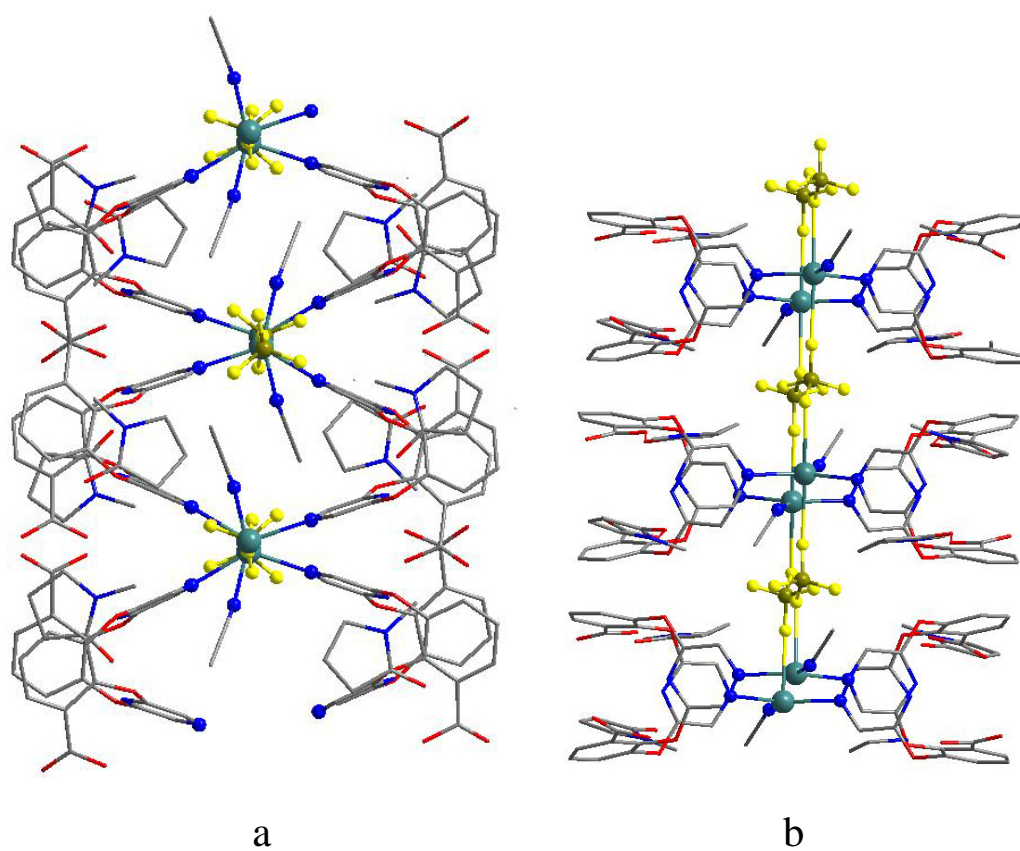

Figure S3 Packing diagram of complex **7** viewed along c (a) and b (b) axes. Color code: Ag (green), O (red), N (blue), C (gray), B (brown) and F (yellow).

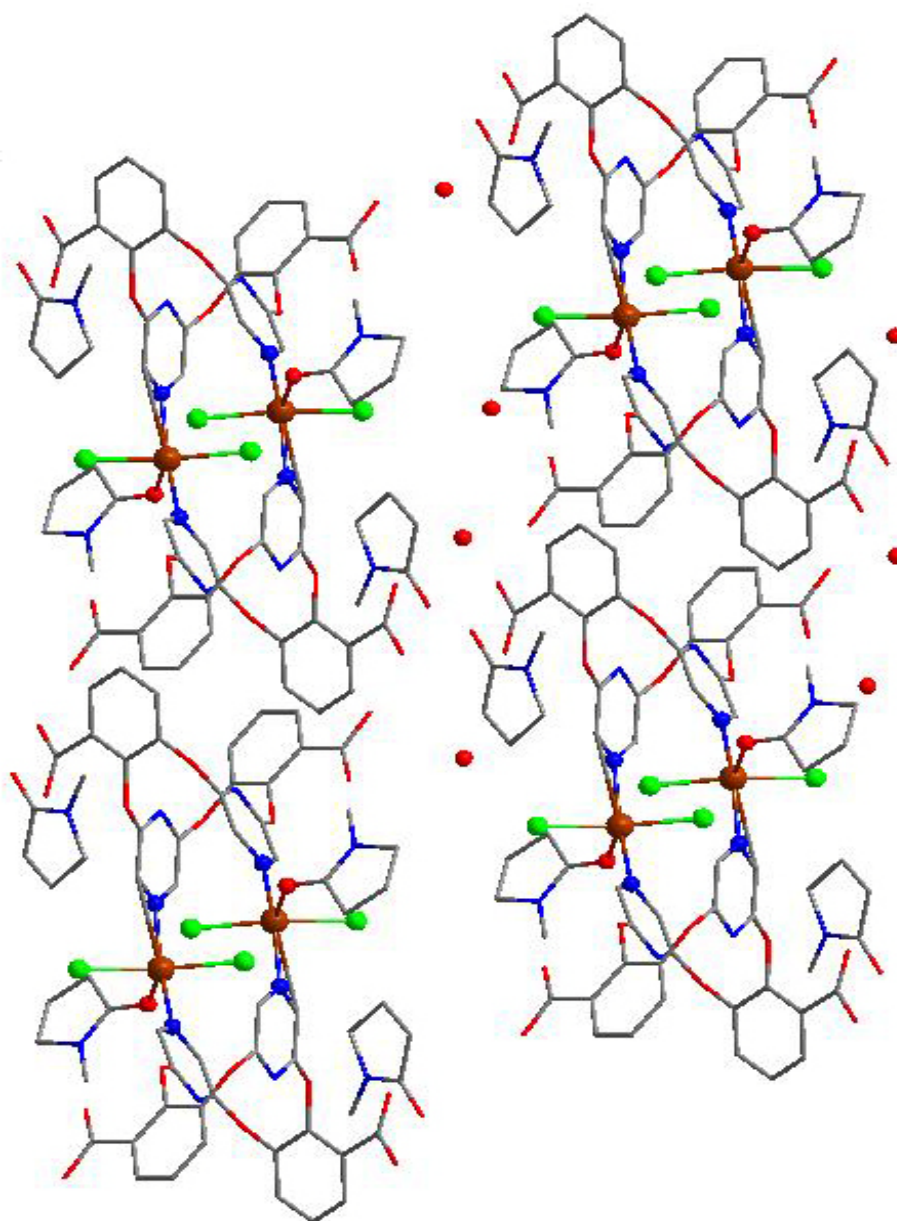

Figure S4 Packing diagram of complex **8** viewed along a axis. Color code: Cu (deep red), O (red), N (blue), C (gray) and Cl (green).

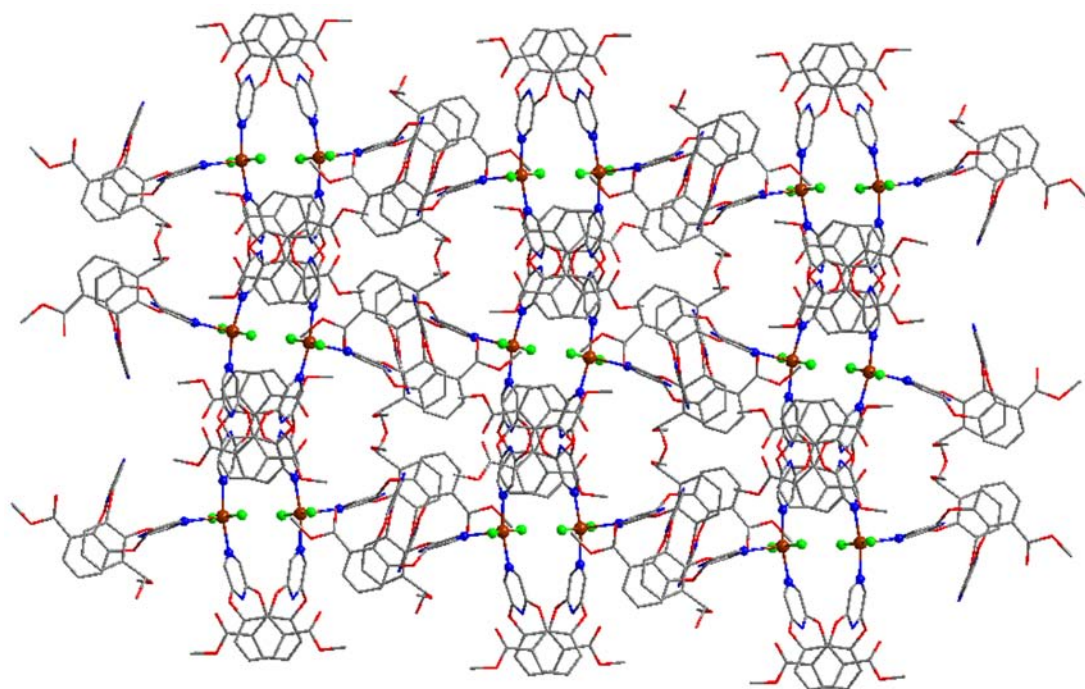

Figure S5 Packing diagram of complex **9** viewed along b axis. Color code: Cu (deep red), O (red), N (blue), C (gray) and Cl (green).

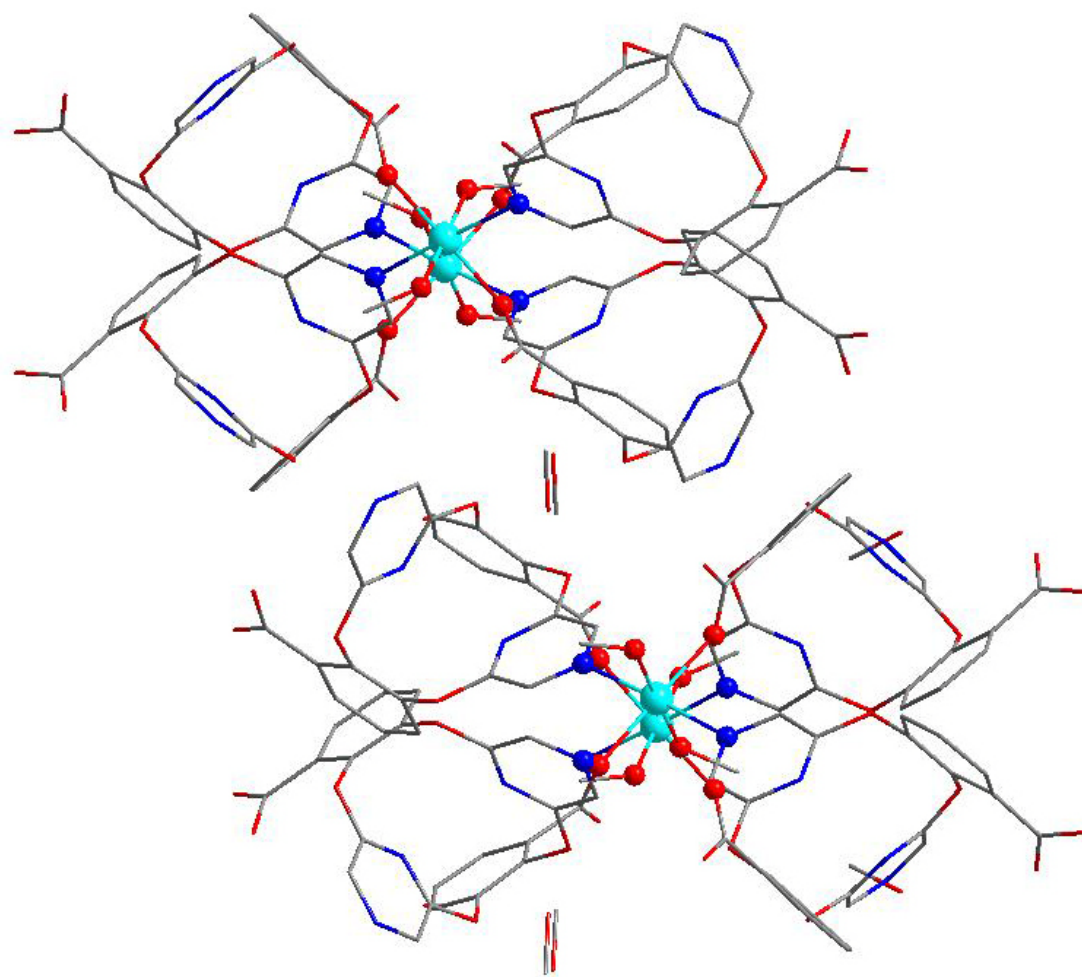

Figure S6 Packing diagram of complex **10** viewed along c axe. Color code: Zn (green), O (red), N (blue) and C (gray).



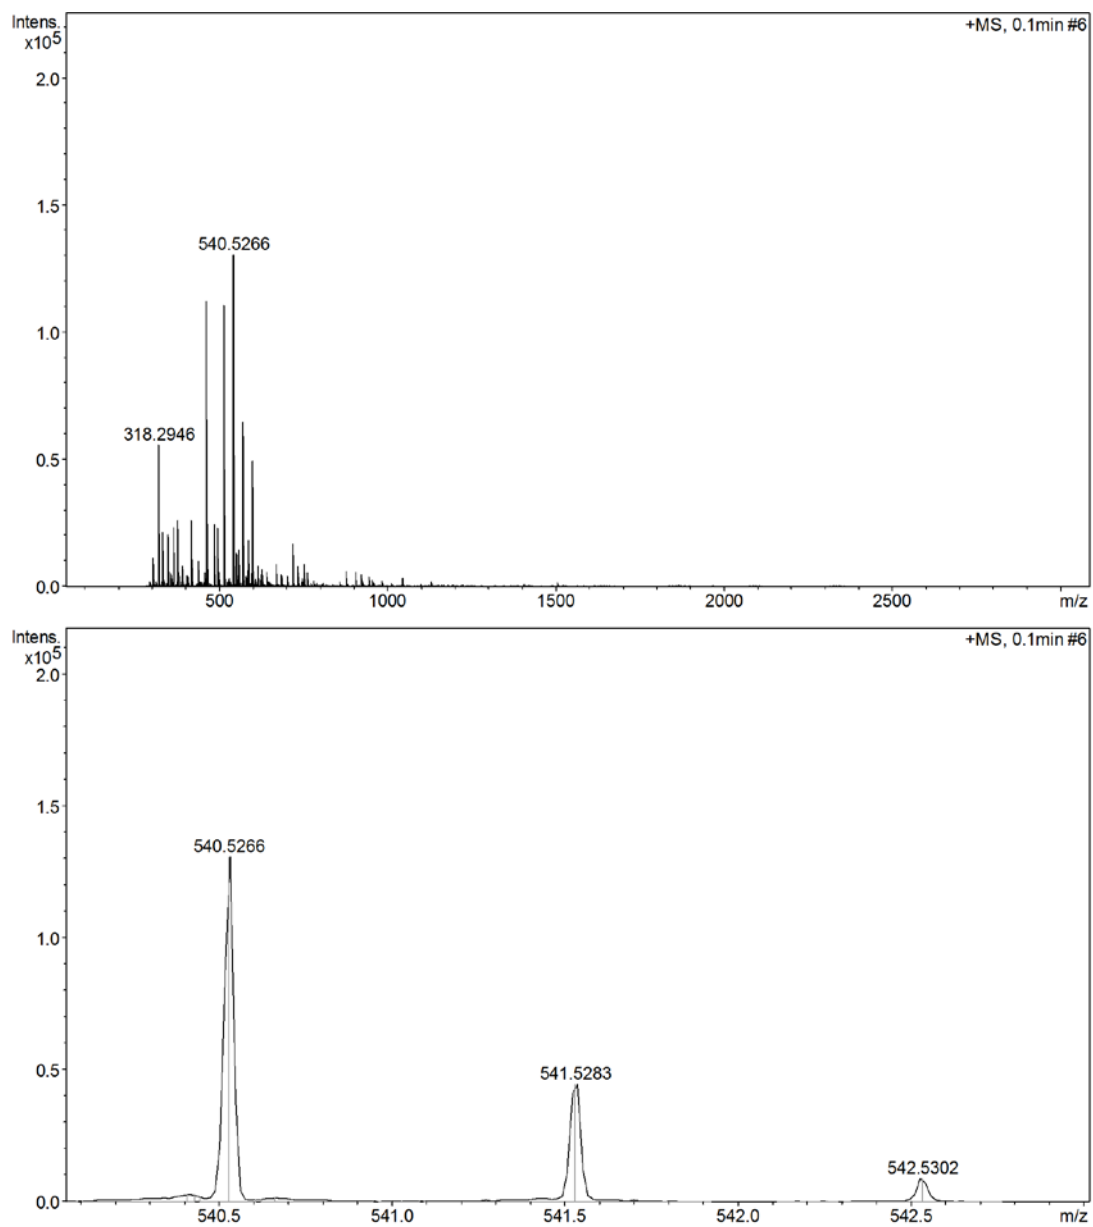

Figure S7 HRMS spectrum of 1:1 adducts of **3** and pyridine in solution.

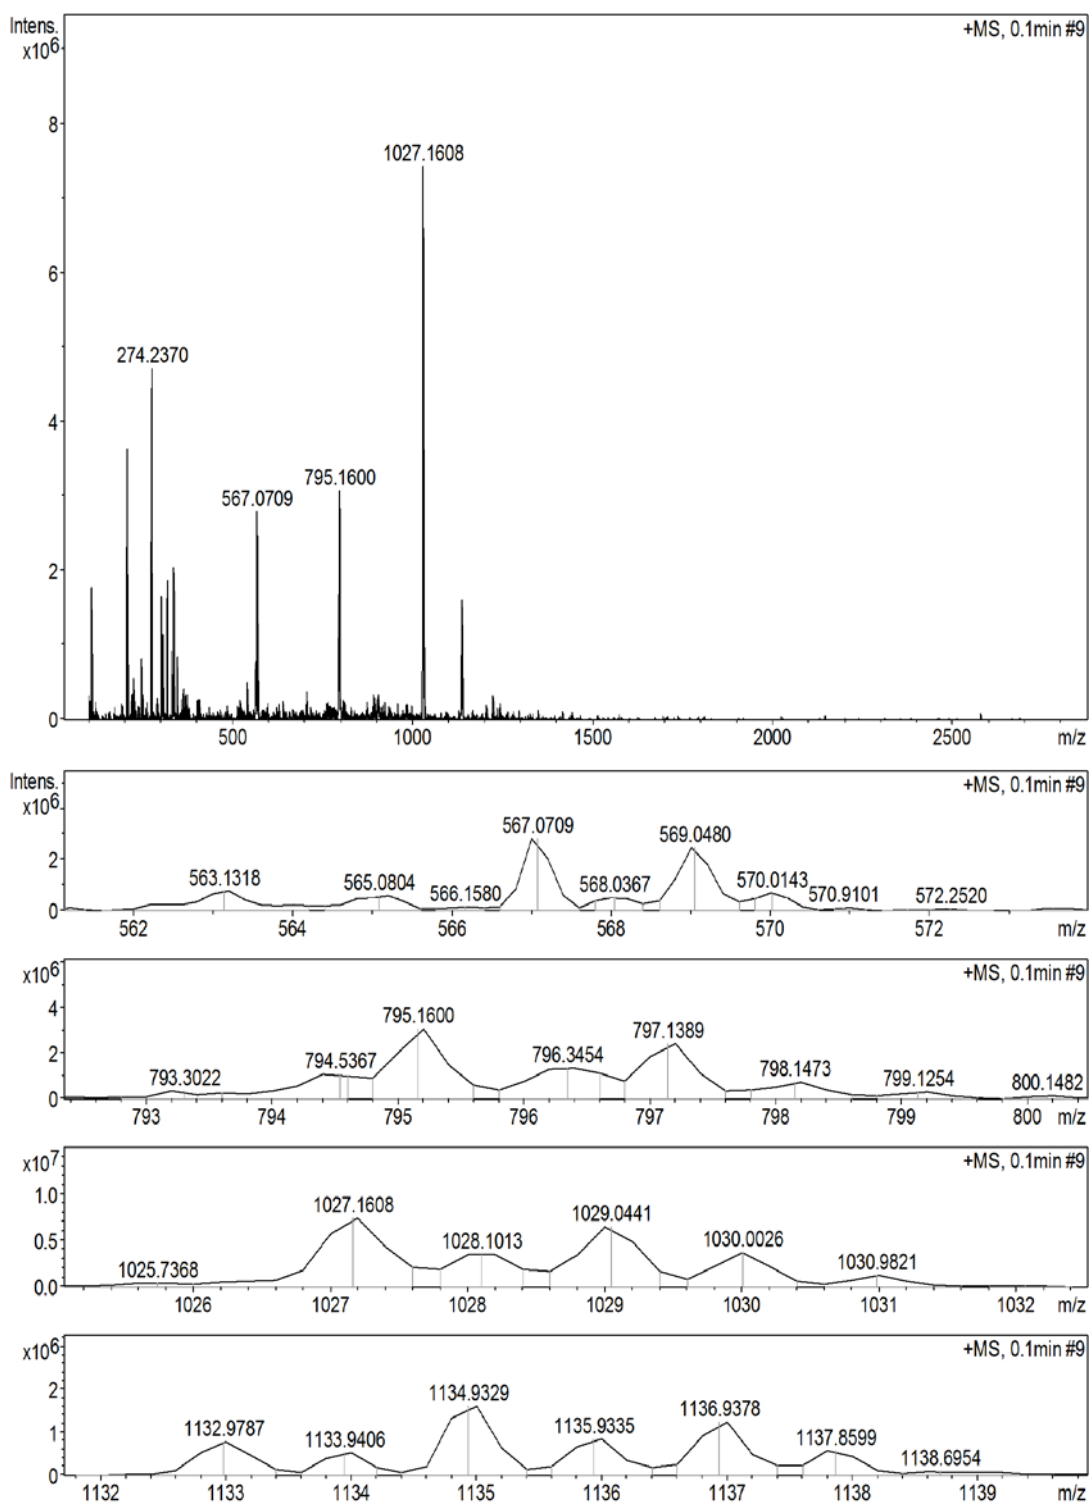

Figure S8 HRMS spectrum of  $[\text{Ag}_2(\mathbf{3})_2 \cdot 2\text{ACN}]$  in NMP solution. Signals at  $m/z$  567.1, 795.2, 1027.2 and 1035.0 can be assigned to  $[\text{Ag}(\mathbf{3})]^{1+}$  or  $[\text{Ag}_2(\mathbf{3})_2]^{2+}$ ,  $[\text{Ag}_2(\mathbf{3}^-) \cdot 3\text{ACN}]^+$ ,  $[\text{Ag}(\mathbf{3})_2]^+$  and  $[\text{Ag}_2(\mathbf{3}^-) \cdot \text{NMP}]^+$ , respectively.

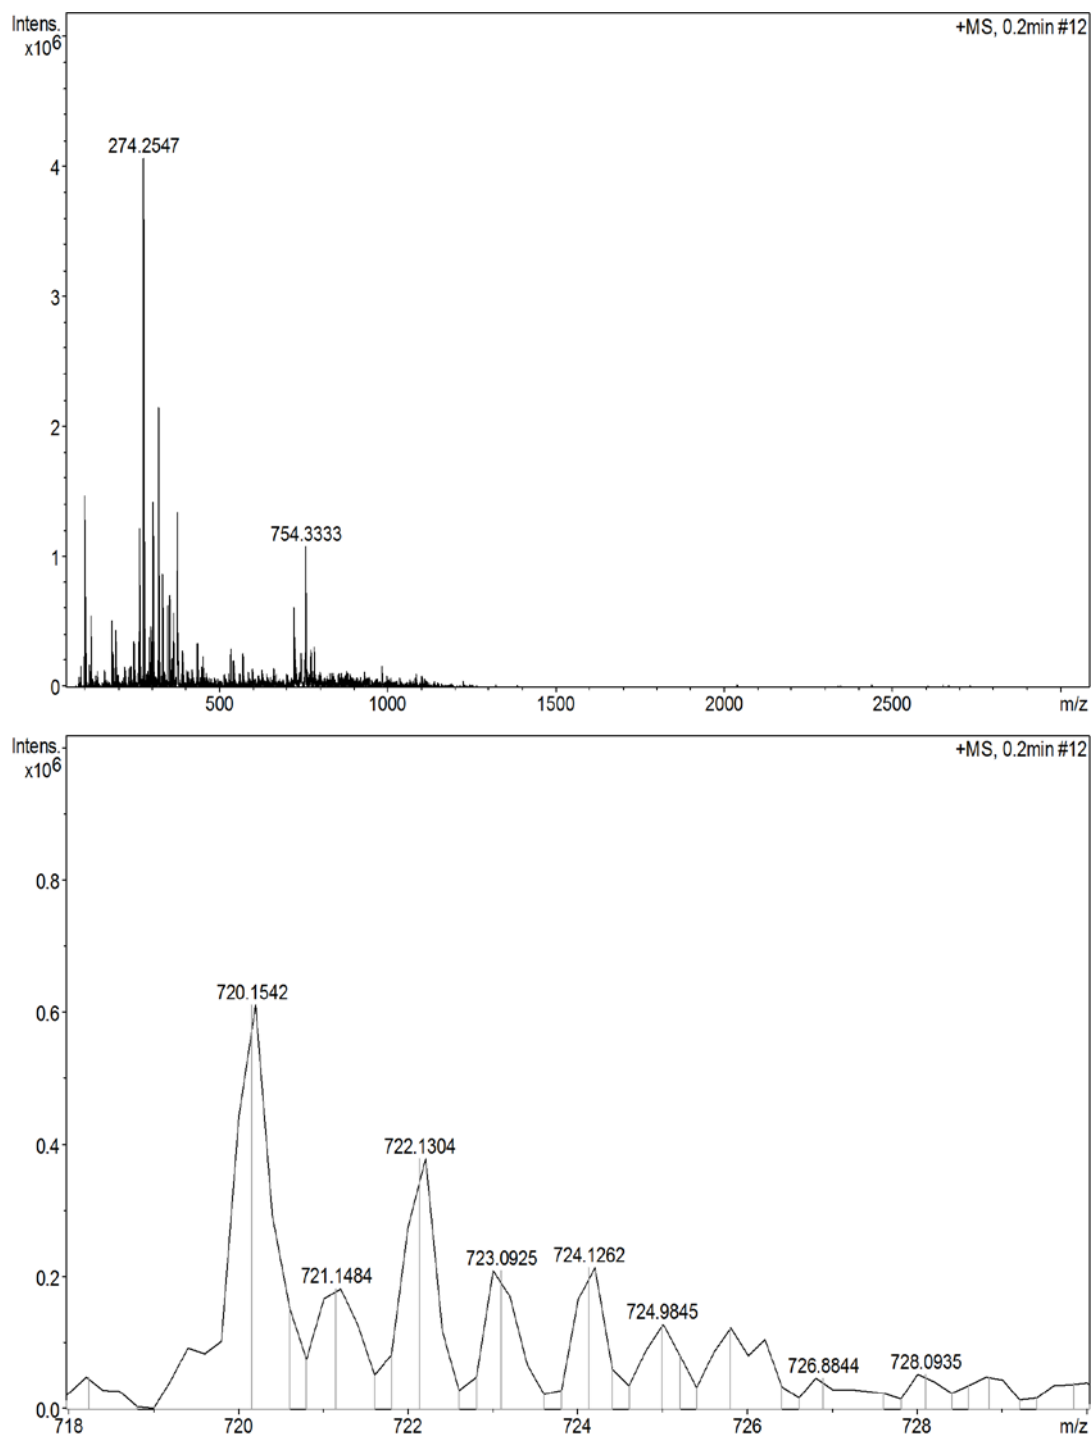

Figure S9 HRMS spectrum of  $[\text{Cu}_2(\mathbf{3})_2\text{Cl}_4]\cdot 2\text{NMP}$  in NMP solution. Only signal at 720.2 could be assigned to  $[\text{Cu}(\mathbf{3})\cdot 2\text{NMP}]^+$  or  $[\text{Cu}_2(\mathbf{3})_2\cdot 4\text{NMP}]^{2+}$ , other signals remains to be correctively assigned.

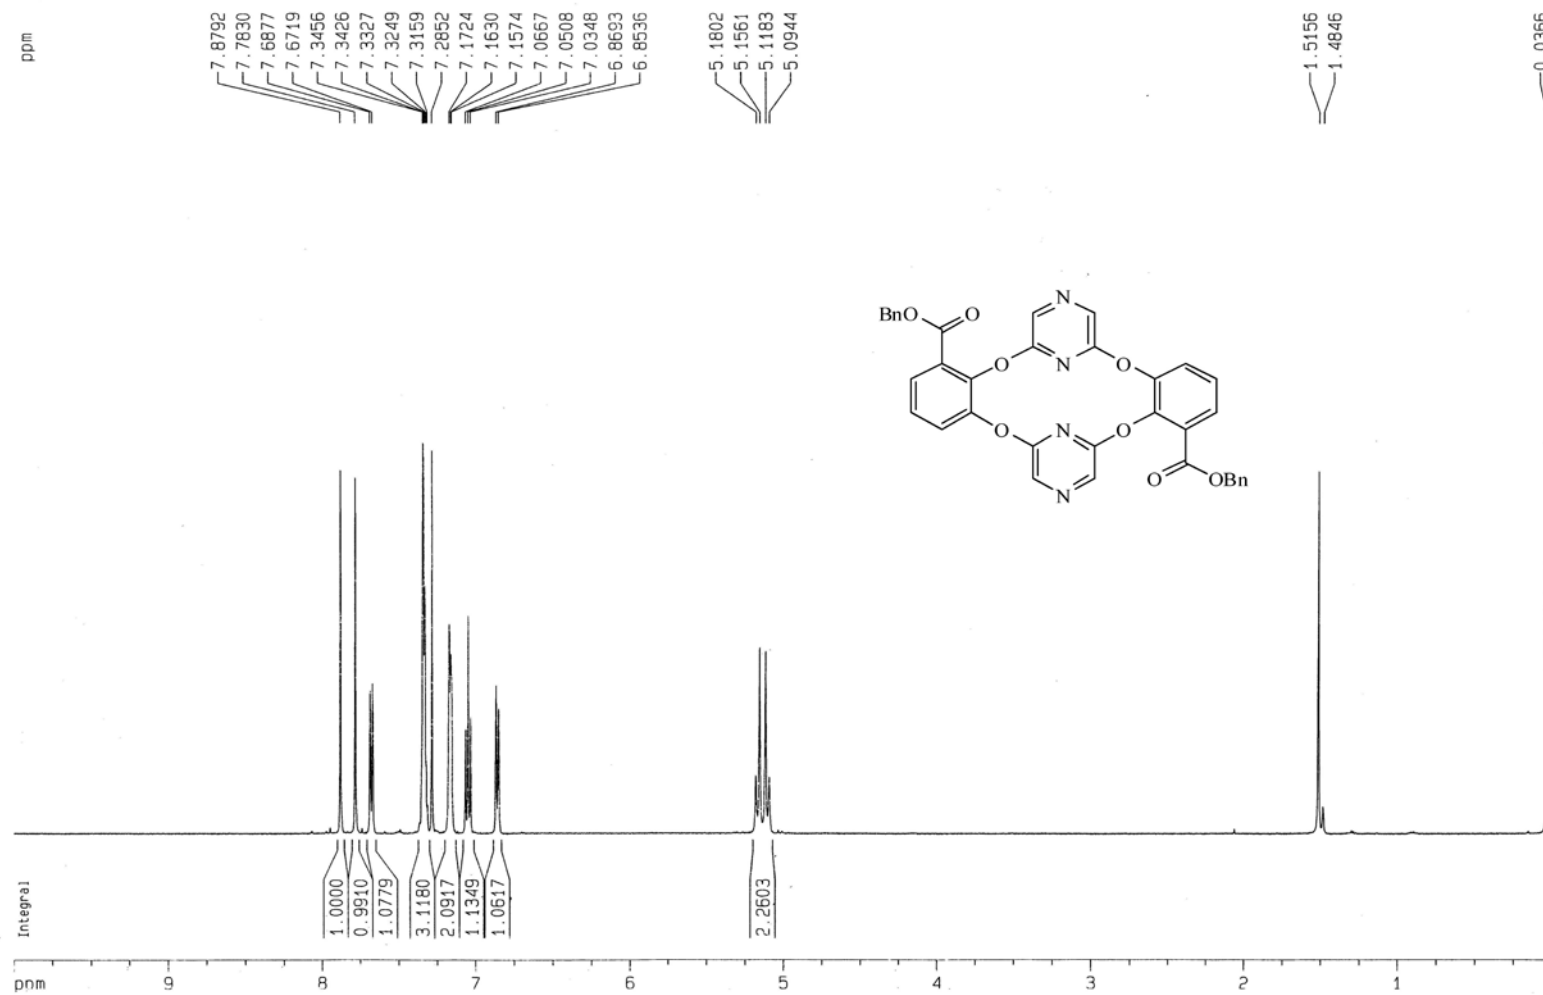

Figure S10  $^1\text{H}$  NMR spectrum of the isomeric **6** in  $\text{CDCl}_3$ .

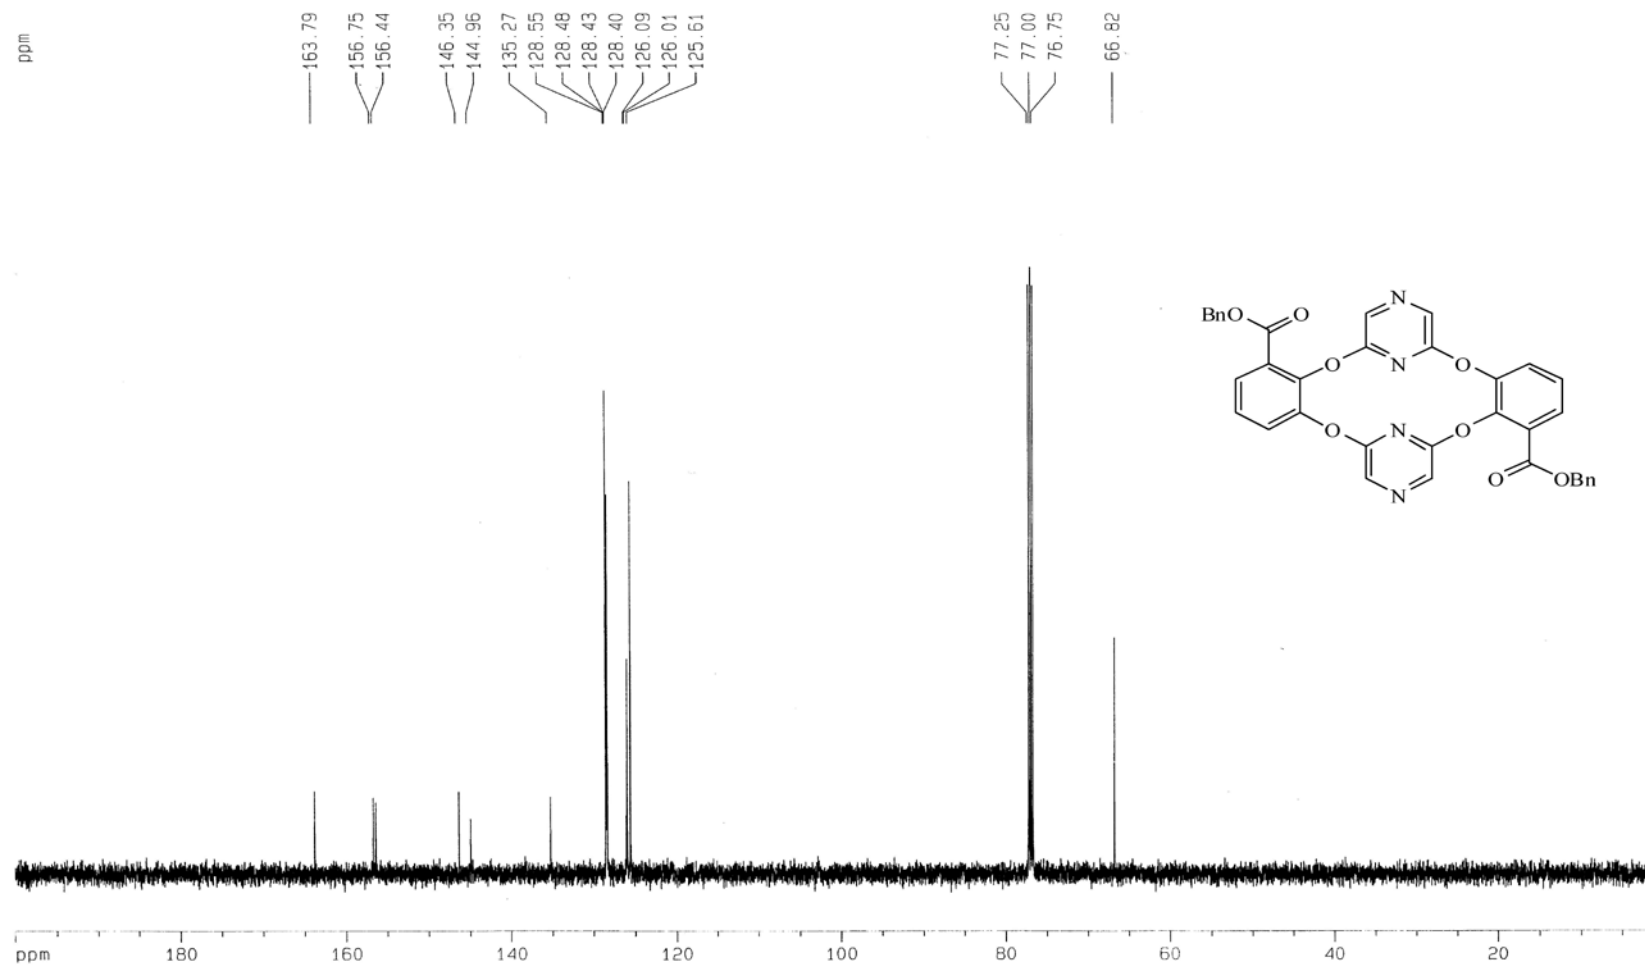

Figure S11  $^{13}\text{C}$  NMR spectrum of the isomeric **6** in  $\text{CDCl}_3$ .

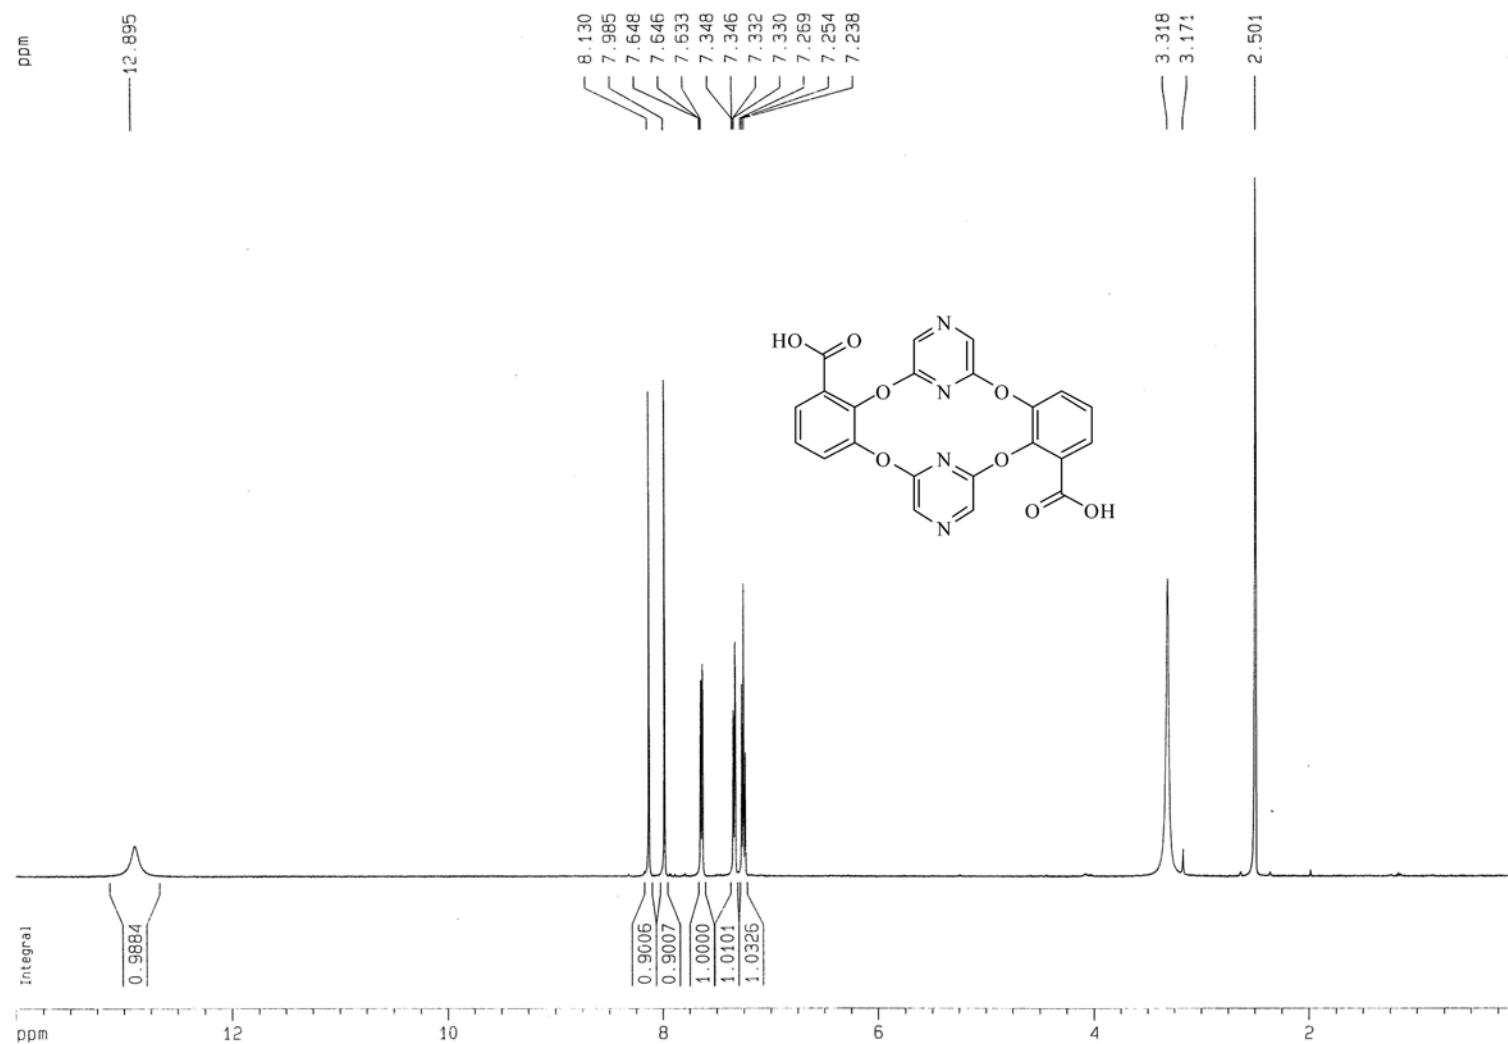

Figure S12  $^1\text{H}$  NMR spectrum of the isomeric **3** in  $\text{DMSO-}d_6$ .

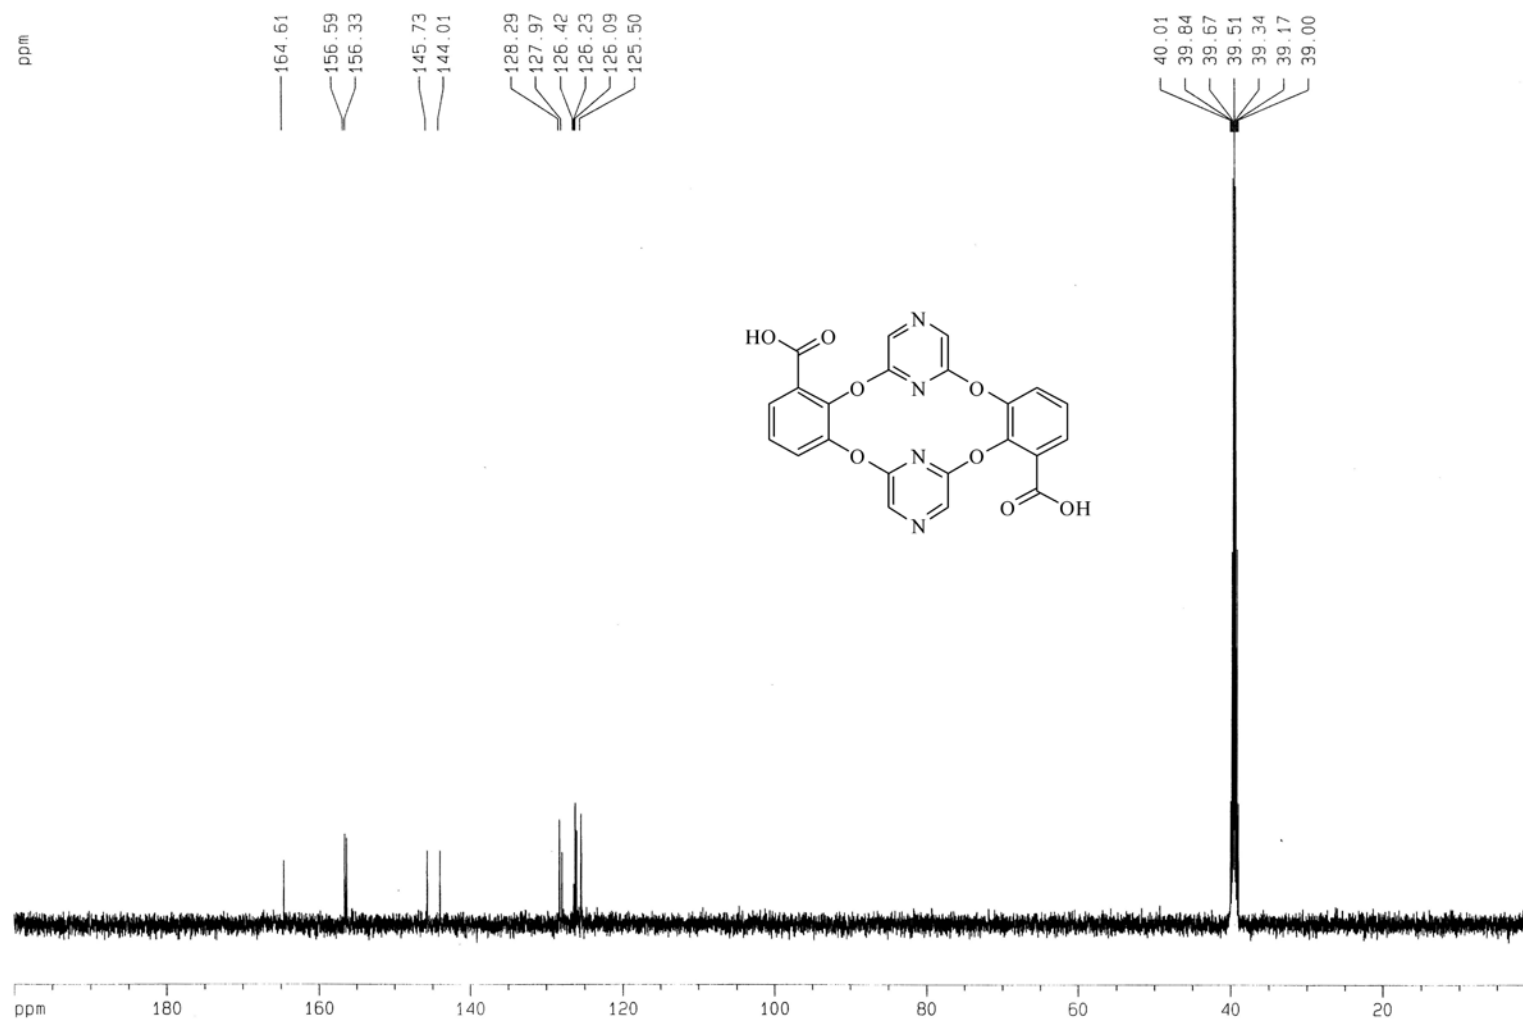

Figure S13  $^{13}\text{C}$  NMR spectrum of the isomeric **3** in  $\text{DMSO-}d_6$ .

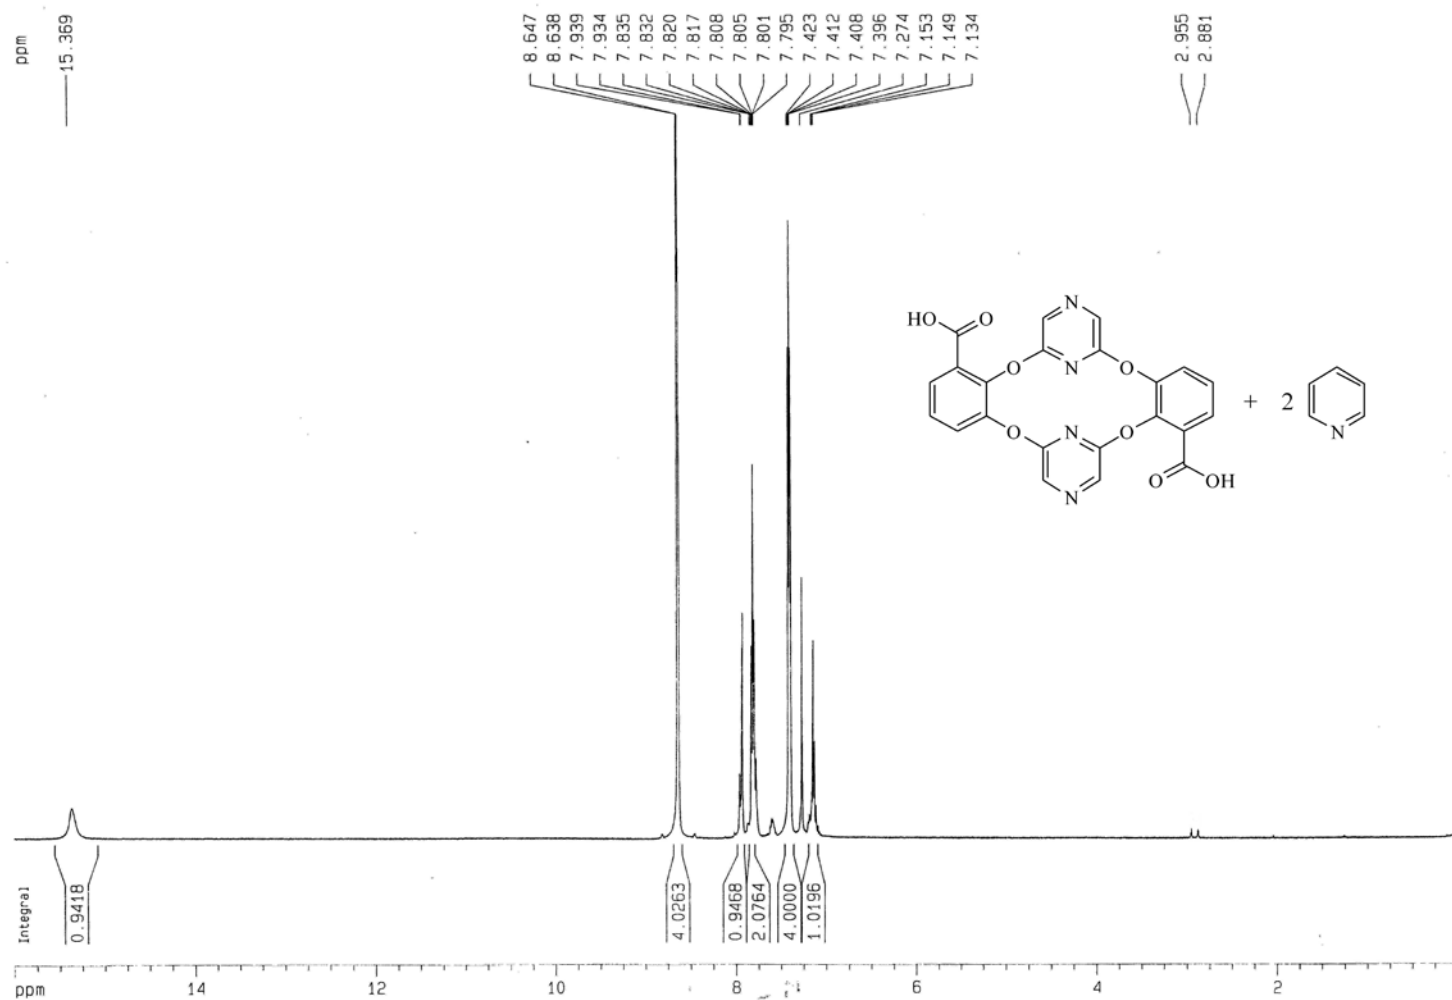

Figure S14  $^1\text{H}$  NMR spectrum of the isomer **3** and pyridine in  $\text{CDCl}_3$ .



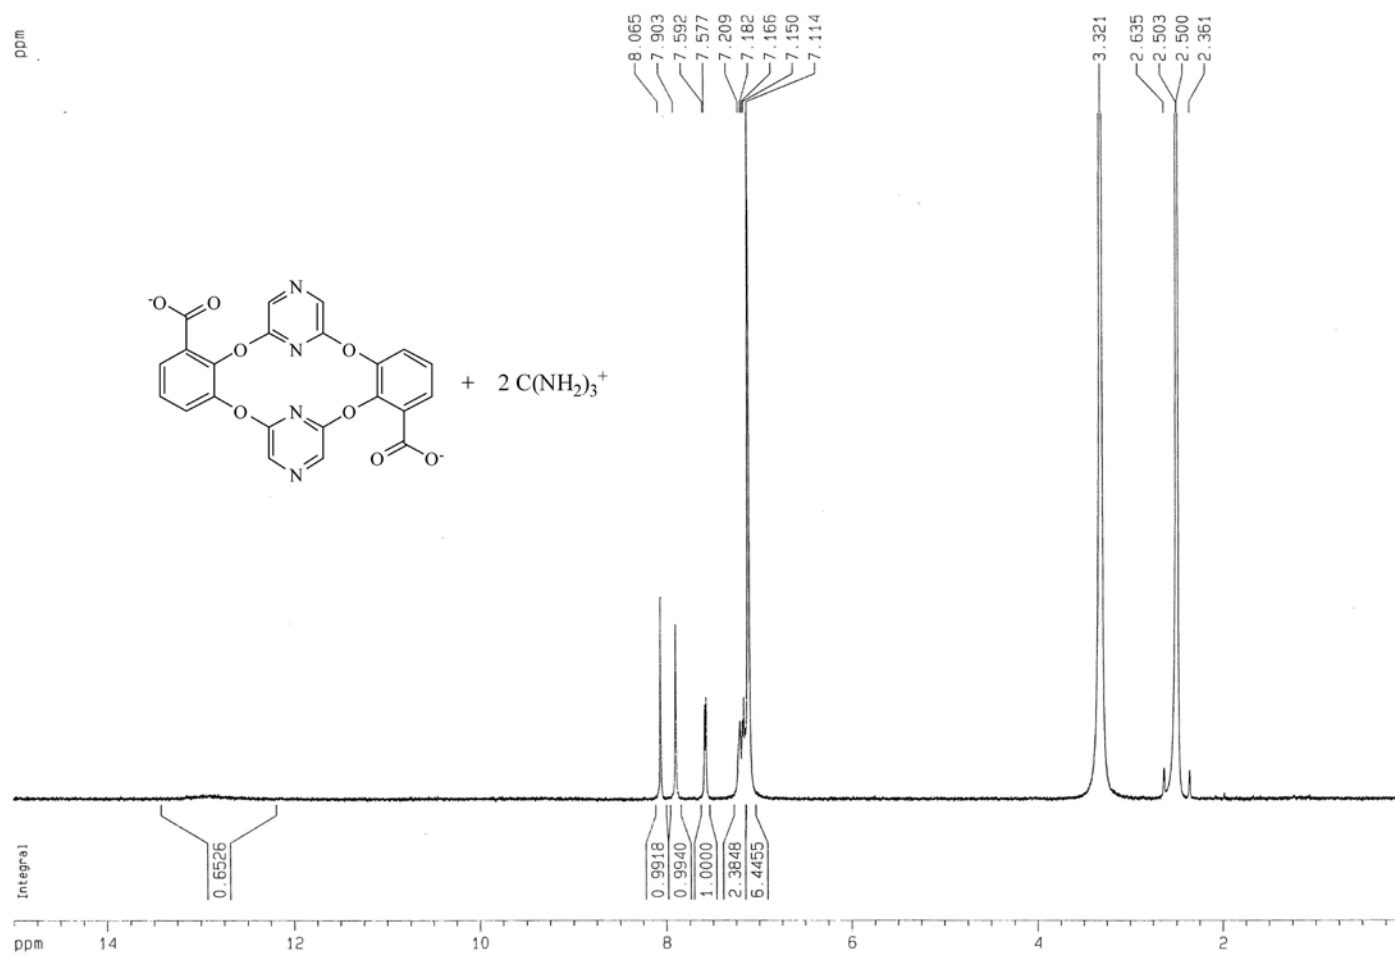

Figure S15  $^1\text{H}$  NMR spectrum of the guanidinium salt of isomeric **3** in  $\text{DMSO-}d_6$ .

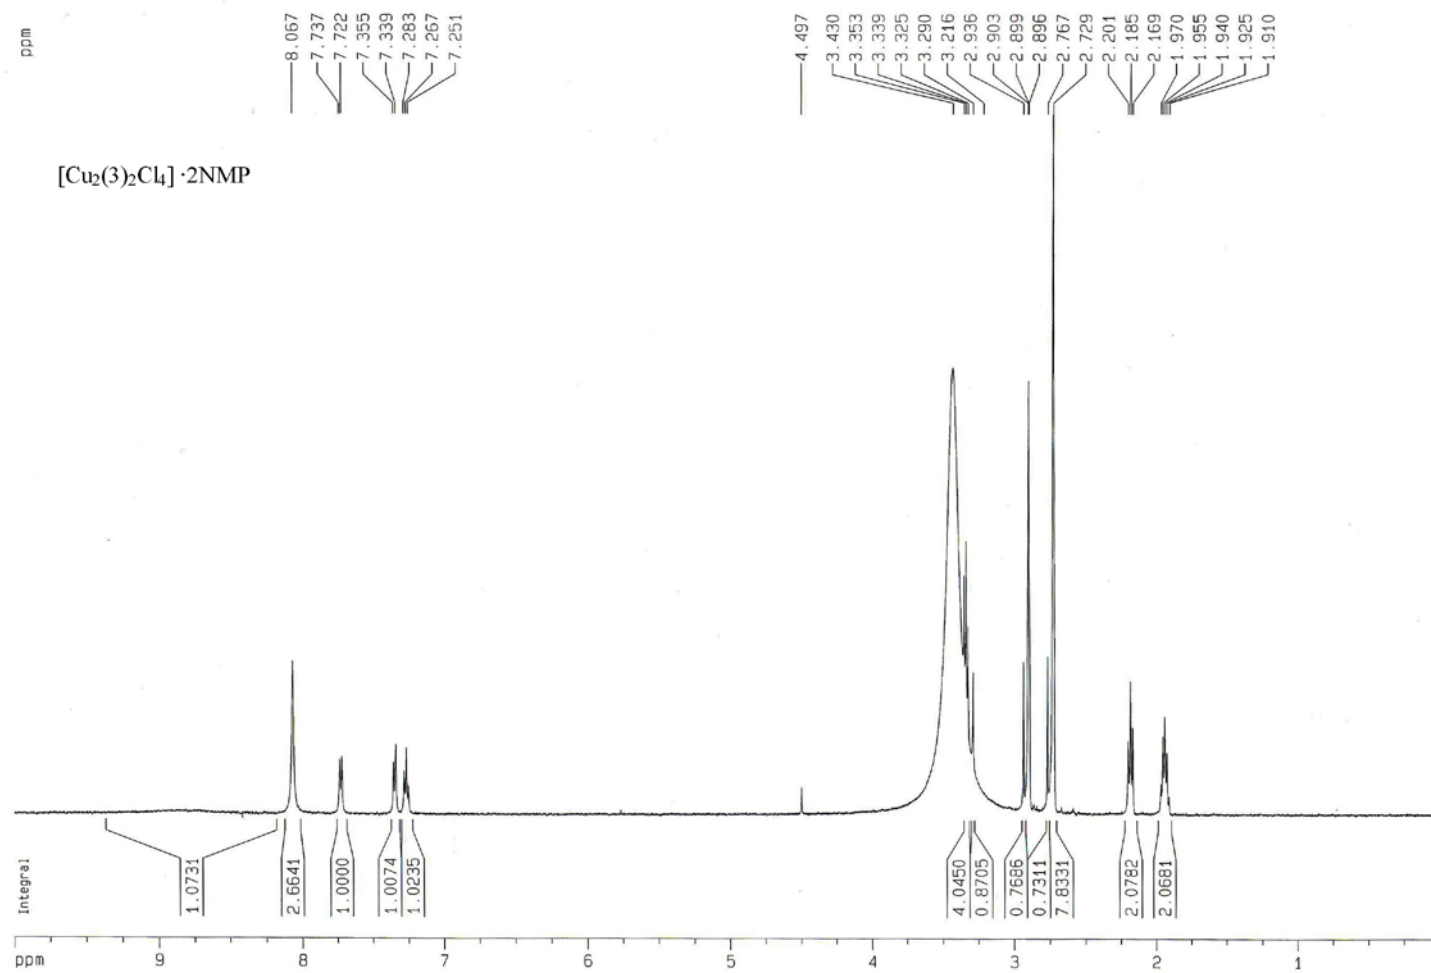

Figure S16 <sup>1</sup>H NMR spectrum of [Cu<sub>2</sub>(3)<sub>2</sub>Cl<sub>4</sub>].2NMP in DMF-*d*<sub>7</sub>.
